# Supplementary material
Source: MDPI journal article supplement (https://www.mdpi.com/2410-3888/7/3/113)
Supplement: s1 [file s1]

## Supplementary materials:

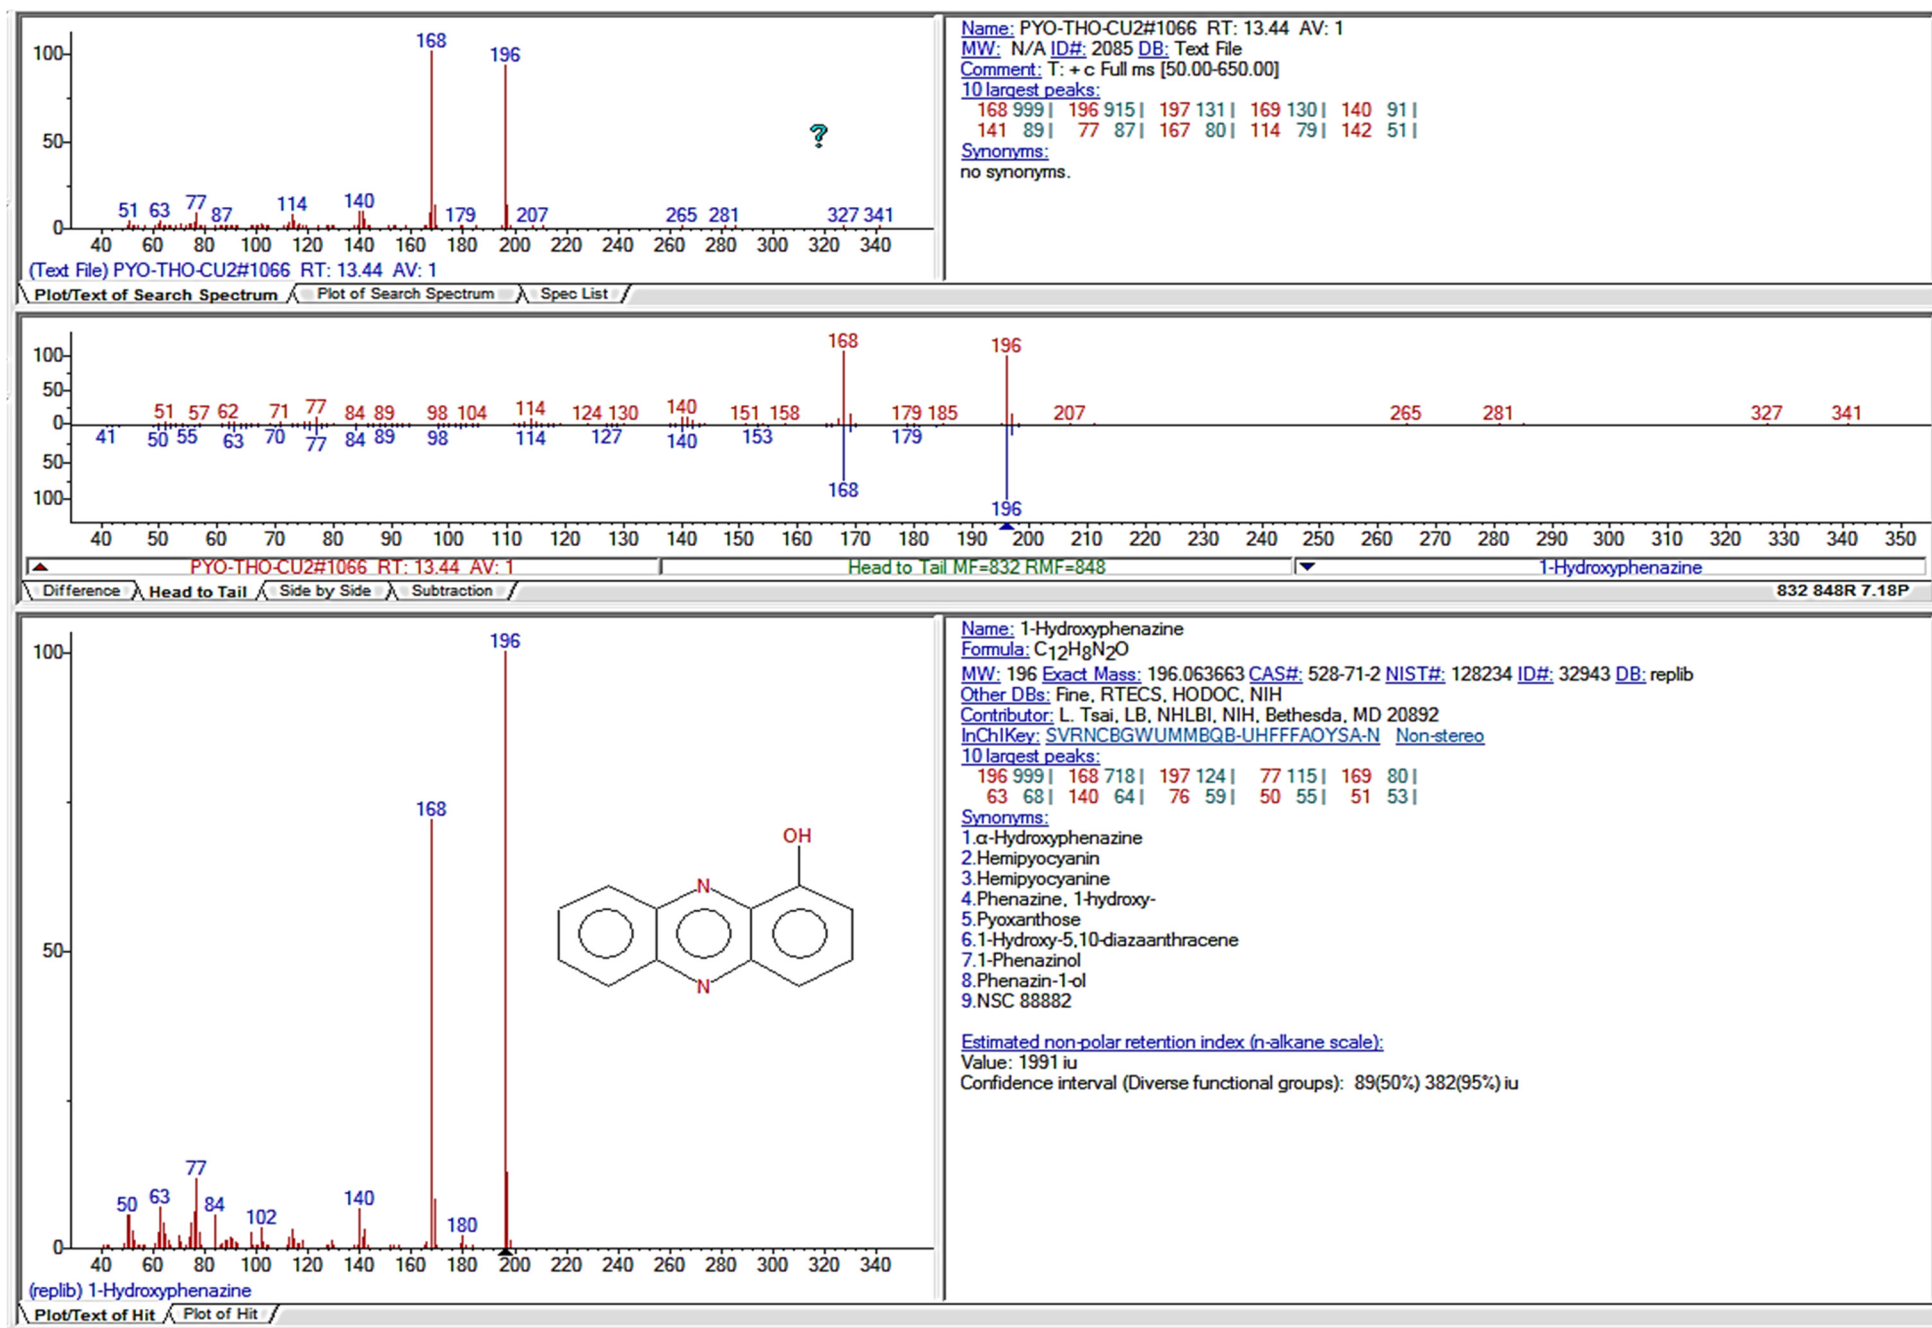

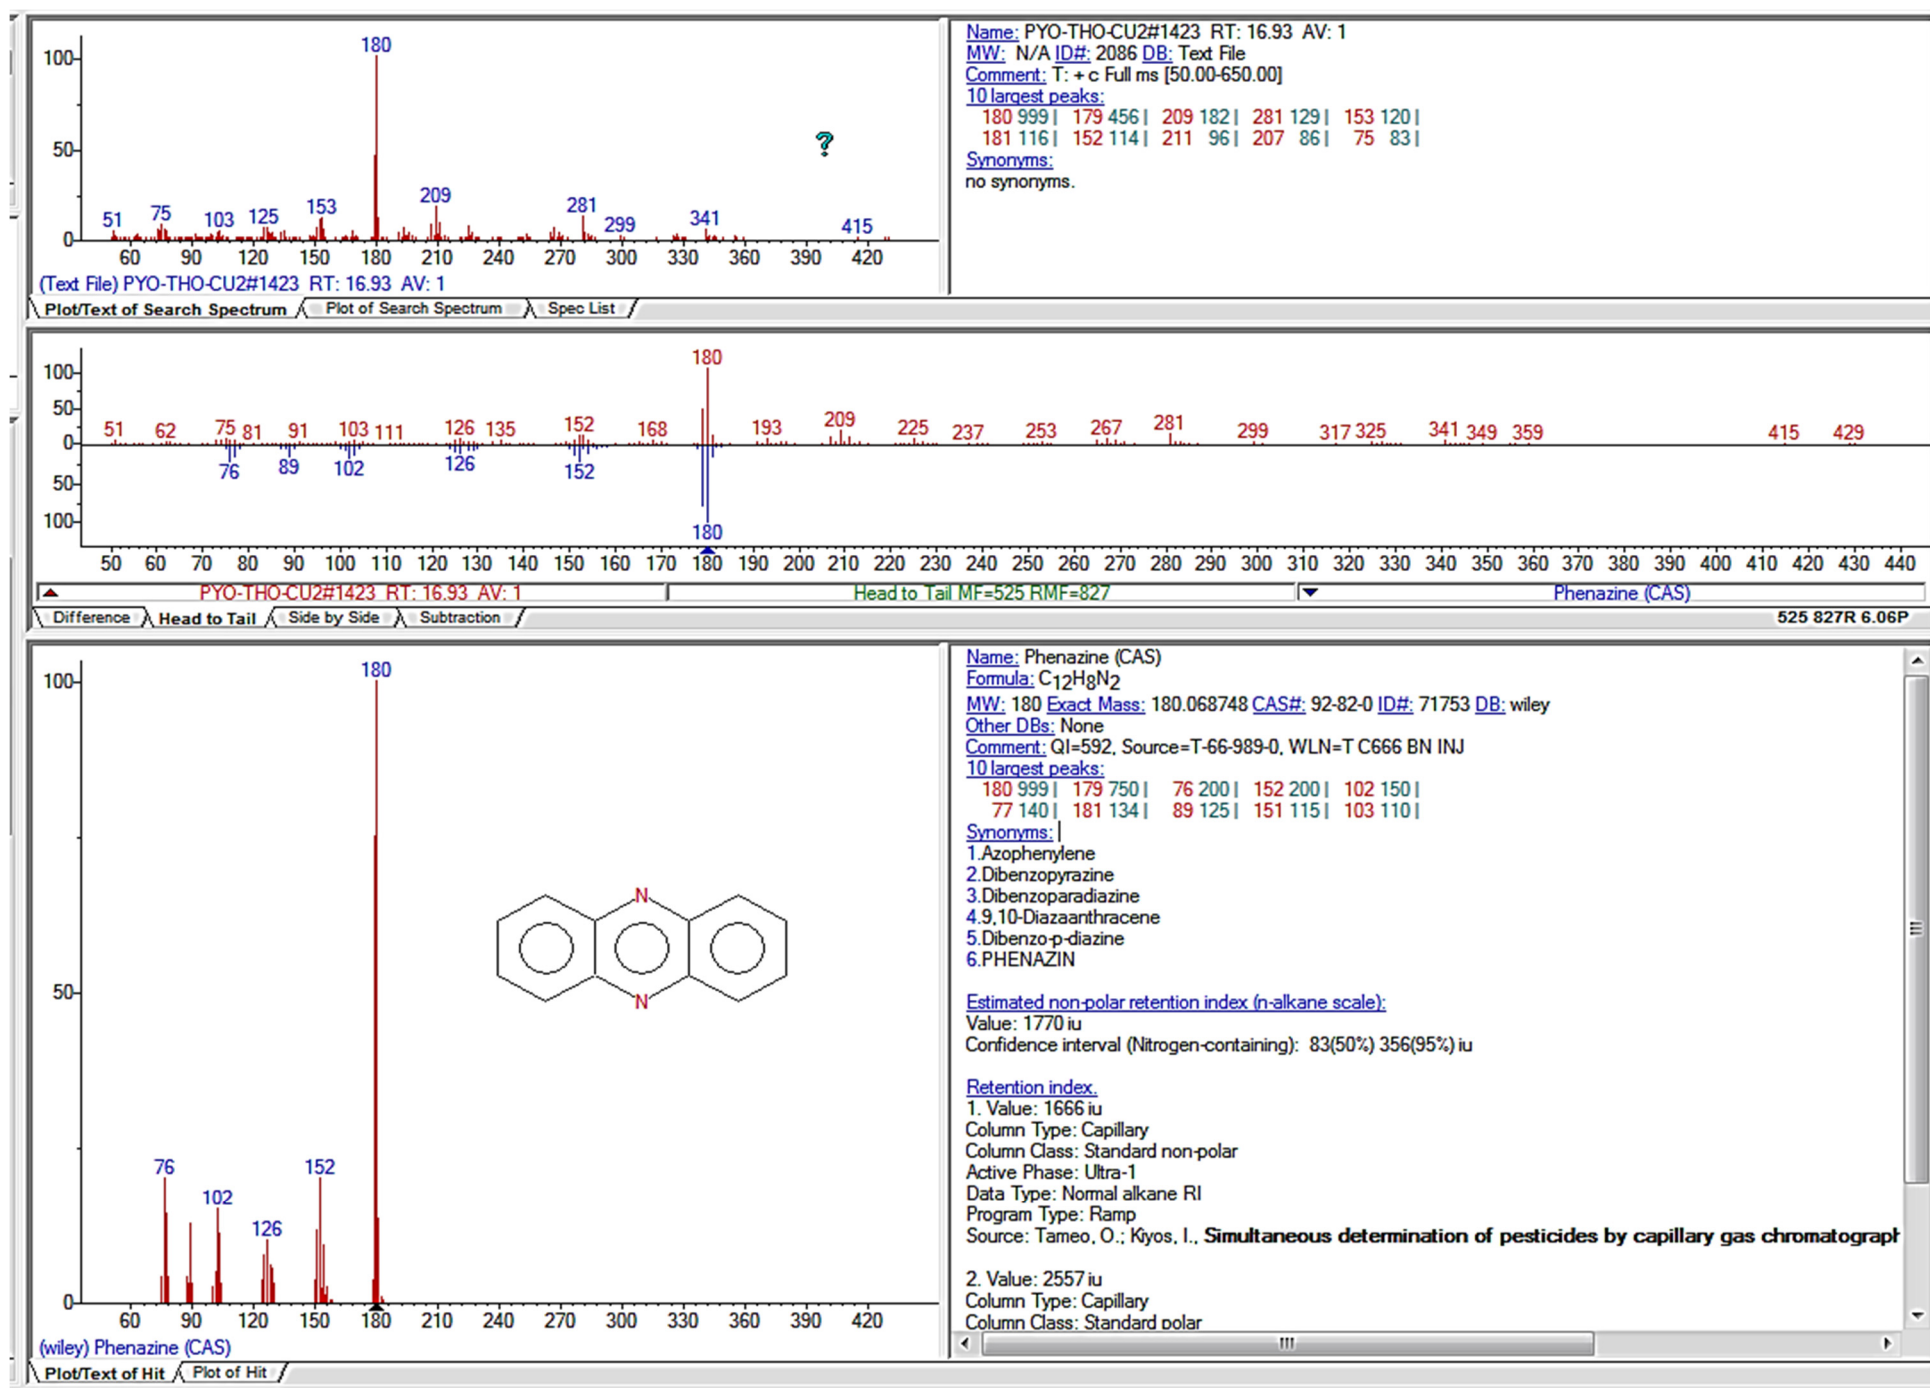

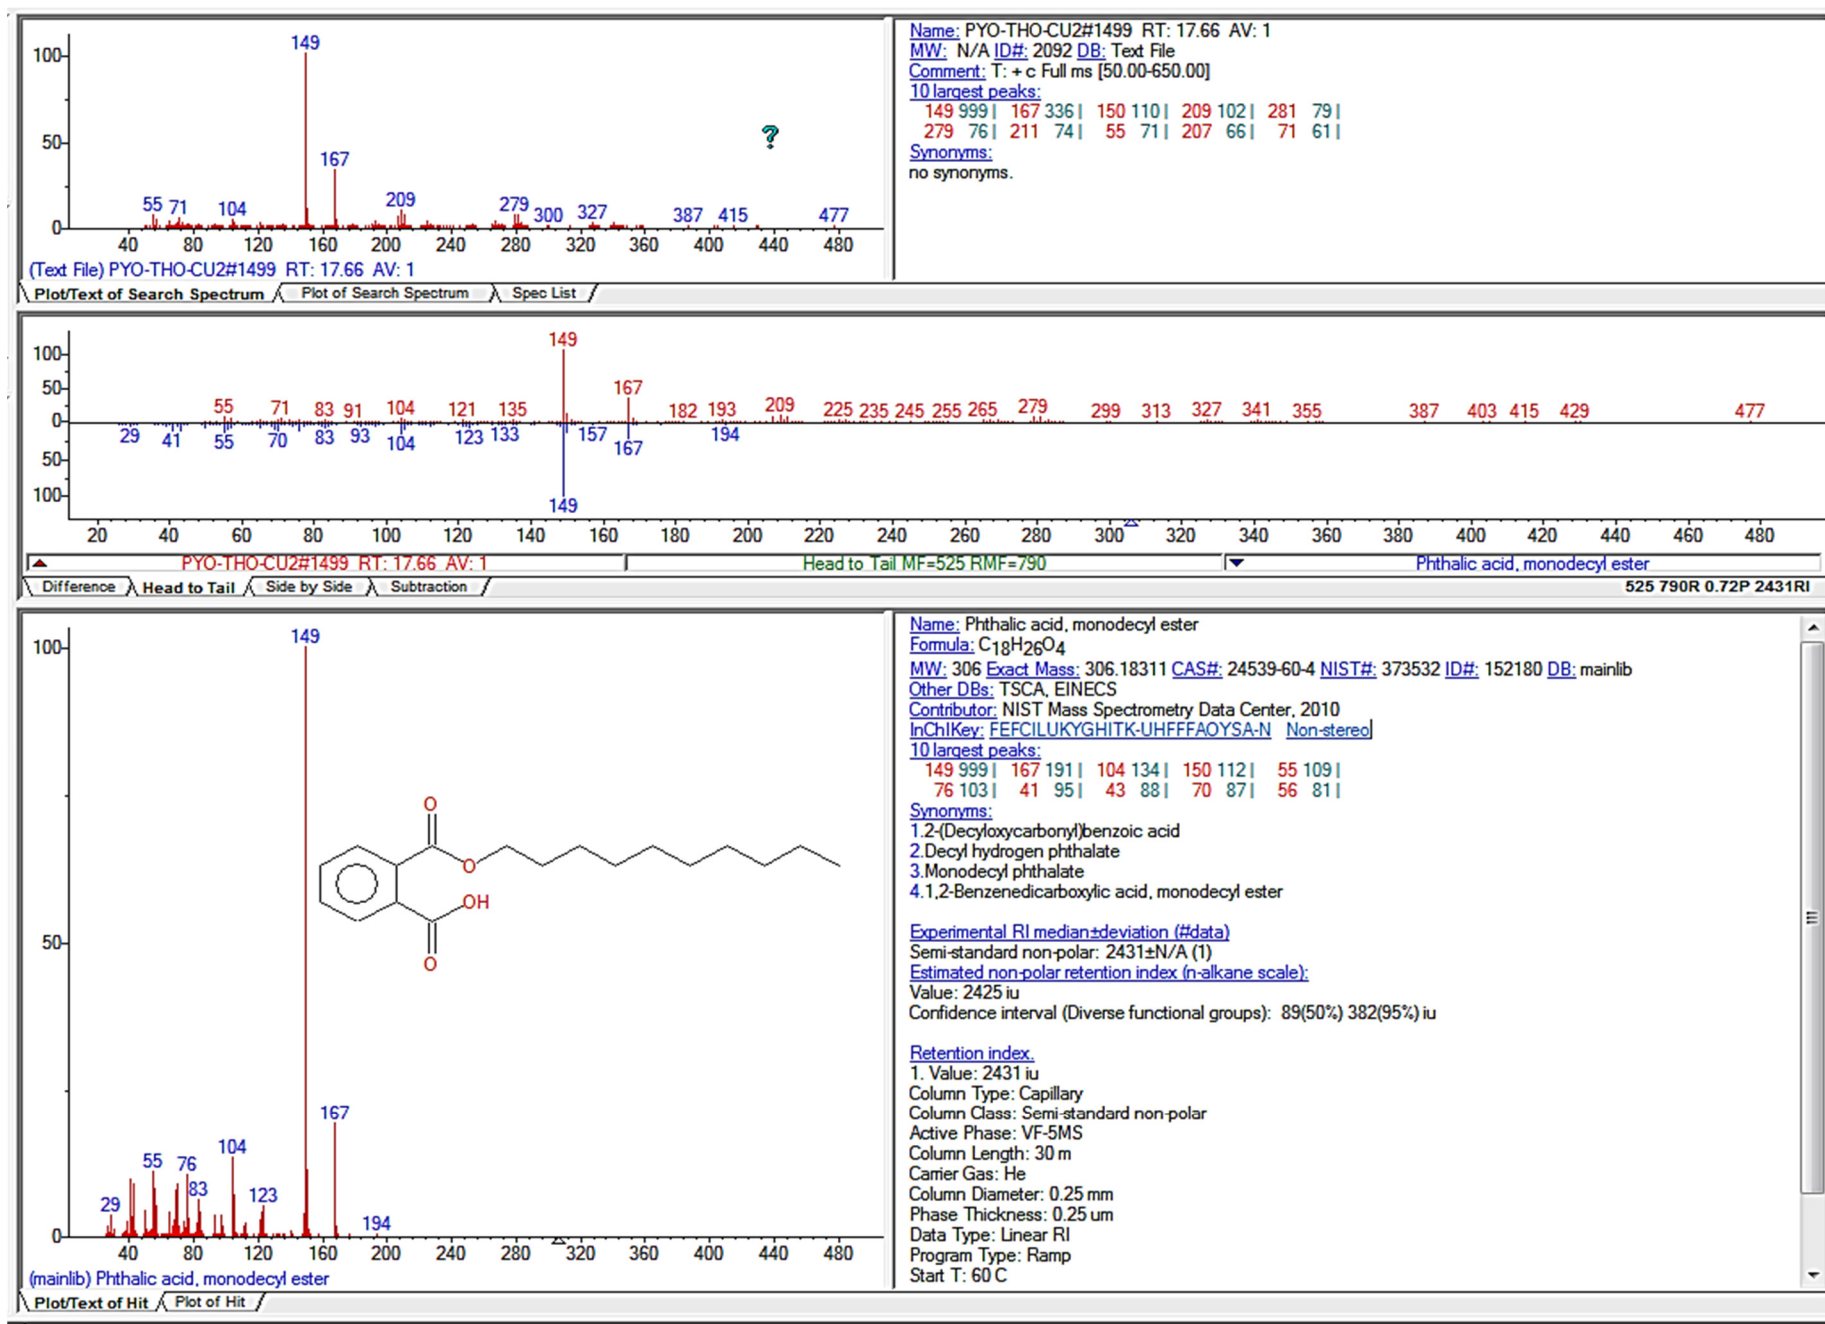

Figure S3. The GCMS analysis of Phthalic acid, monodecyl ester produced by *Pseudomonas aeruginosa* TUN03.

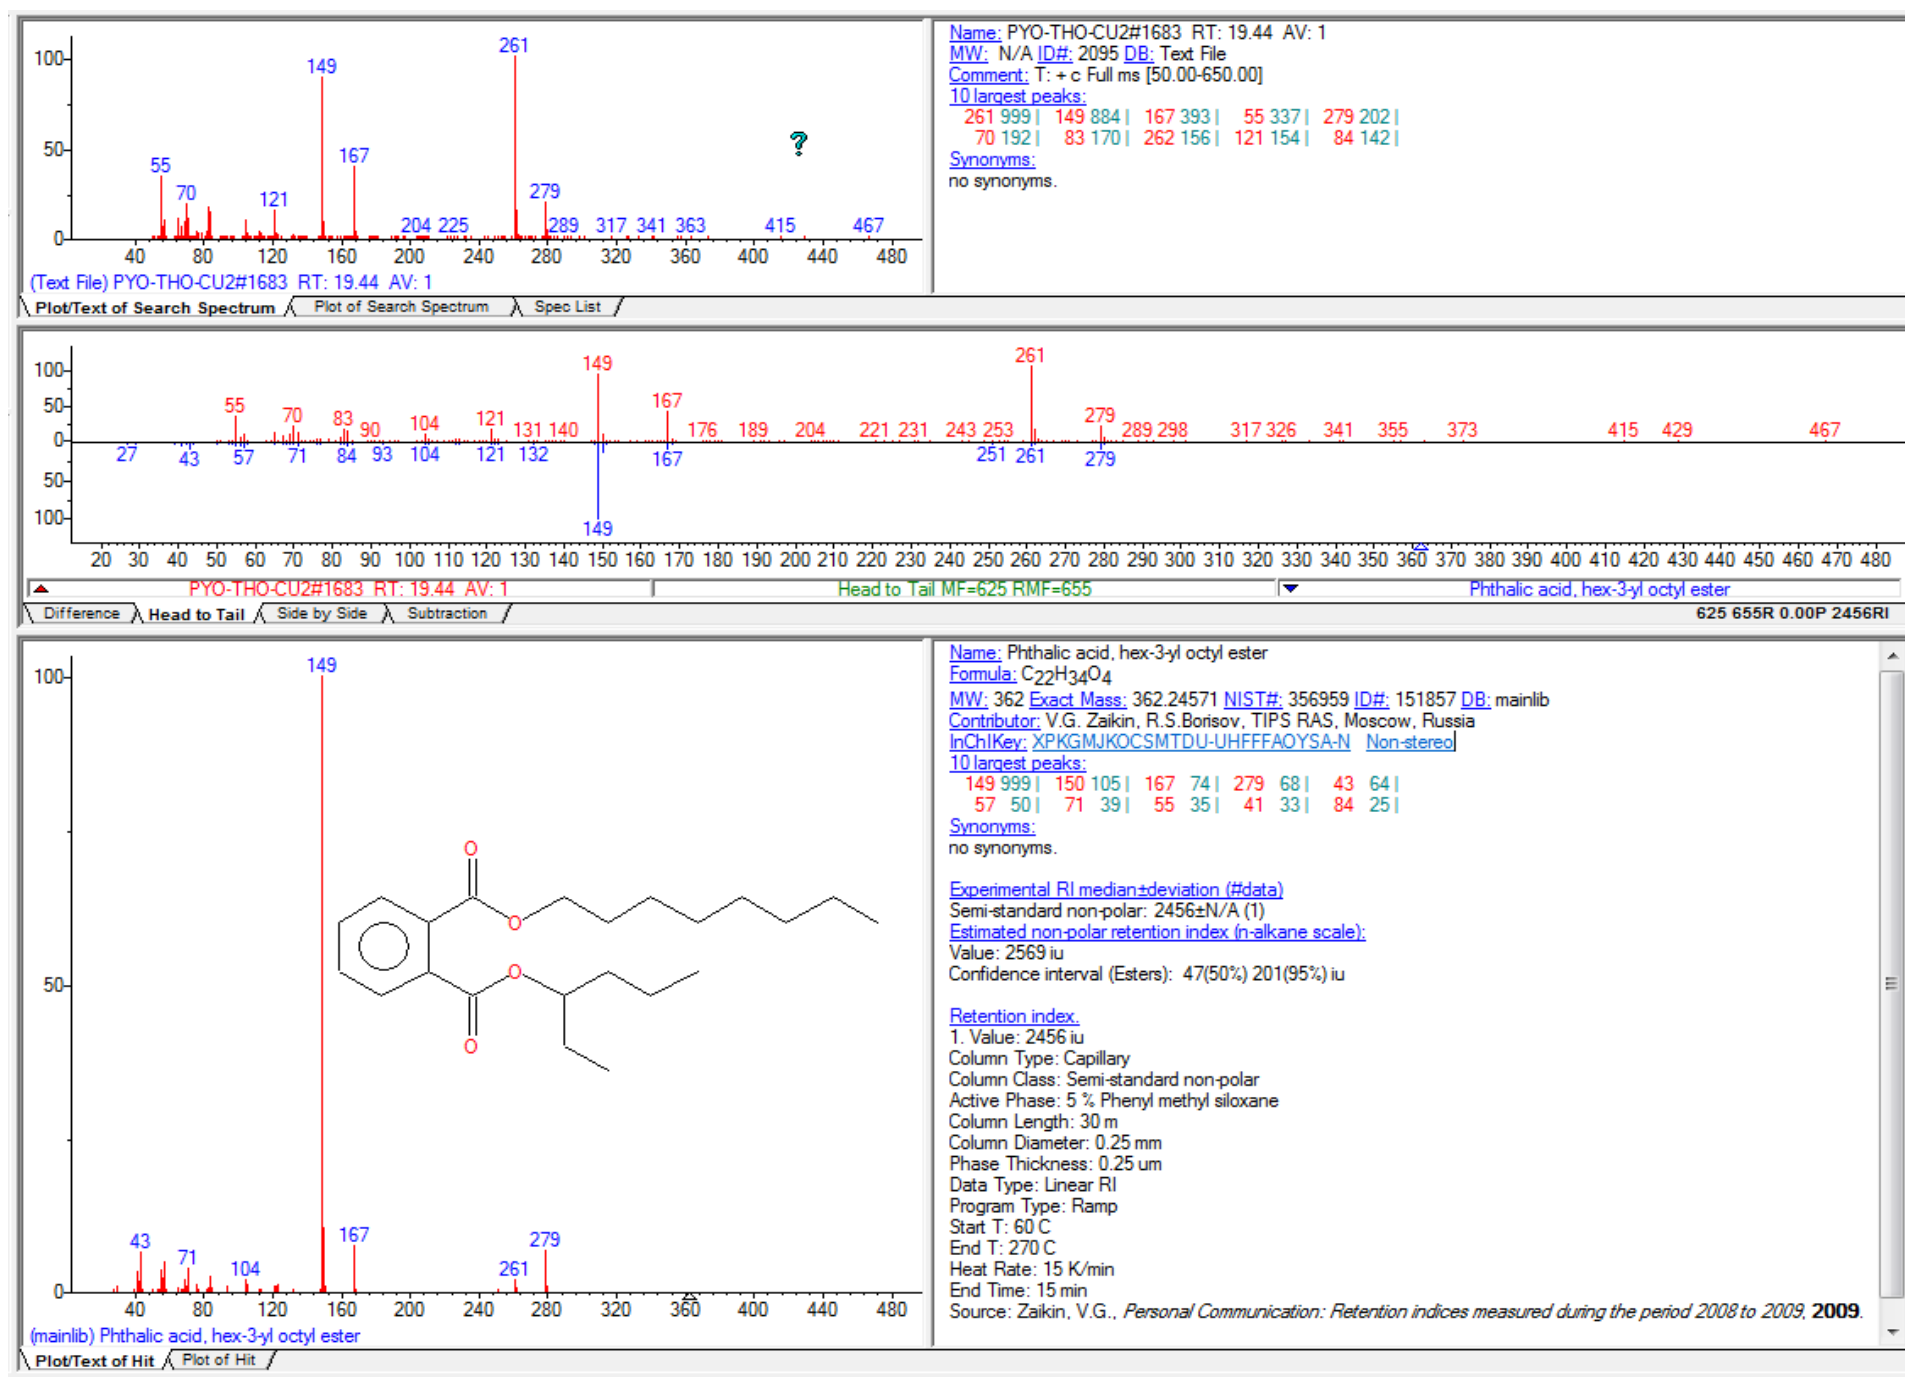

**Figure S4.** The GCMS analysis of The GCMS analysis of Phthalic acid, hex-3-yl octyl ester produced by *Pseudomonas aeruginosa* TUN03.

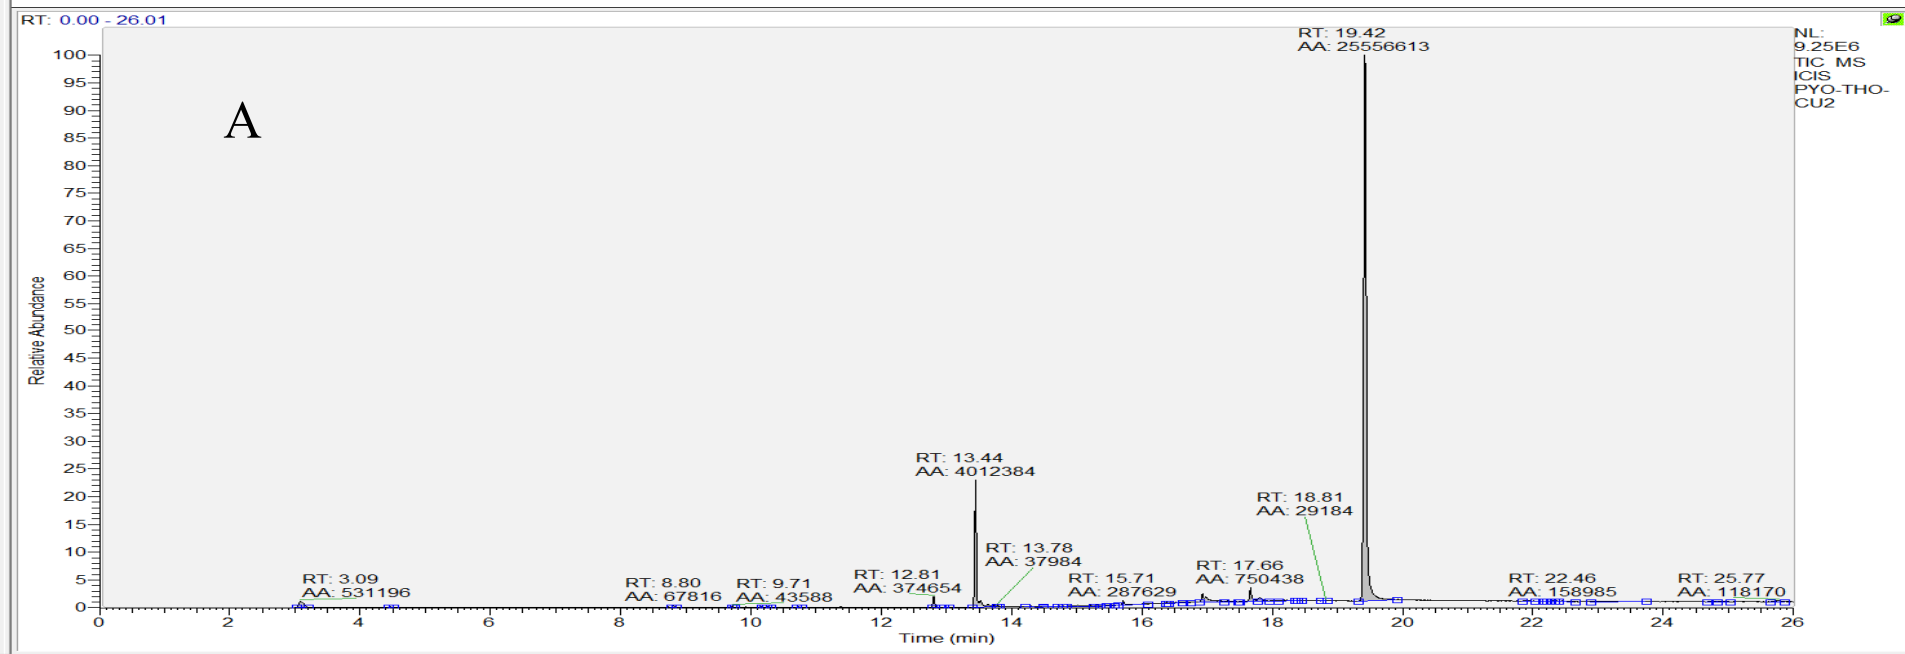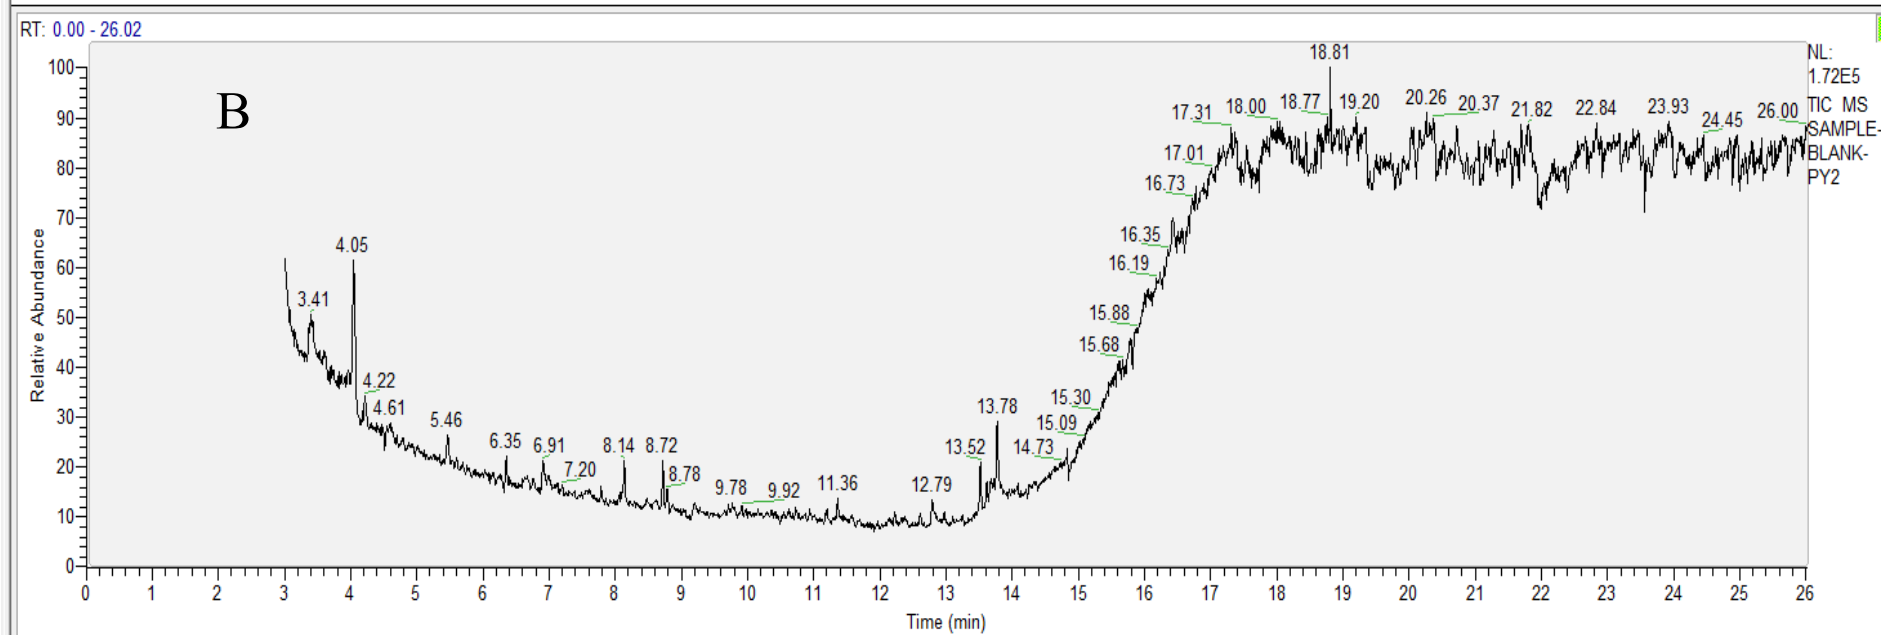

Figure S5. The GC profiles of crude phenazines (A) and the extract of unfermented medium (B)
